# Supplementary material for: Alkali metal–alkaline earth metal borate crystal LiBa3(OH)(B9O16)[B(OH)4] as a new deep-UV nonlinear optical material
Source: Royal Society of Chemistry journal article supplement (doi:10.1039/c6tc02306a), 2016-01-01
Supplement: c6tc02306a1.pdf [file c6tc02306a1.pdf]

## Supporting Information

### Alkali metal-alkaline earth metal borate crystal

### **LiBa<sub>3</sub>(OH)(B<sub>9</sub>O<sub>16</sub>)[B(OH)<sub>4</sub>] as a new deep-UV nonlinear optical material†**

Chao Wu,<sup>a</sup> Junling Song,<sup>a</sup> Longhua Li,<sup>a</sup> Mark G. Humphrey,<sup>b</sup> and Chi Zhang<sup>a\*</sup>

<sup>a</sup> China-Australia Joint Research Center for Functional Molecular Materials, School of Chemical and Material Engineering, Jiangnan University, Wuxi 214122, P. R. China

<sup>b</sup> Research School of Chemistry, Australian National University, Canberra, ACT 2601, Australia

\* Corresponding Author Email: [chizhang@jiangnan.edu.cn](mailto:chizhang@jiangnan.edu.cn)

## CONTENTS

Table S1. Selected bond distances (Å) and angles (deg) for  $\text{LiBa}_3(\text{OH})(\text{B}_9\text{O}_{16})[\text{B}(\text{OH})_4]$ .

Scheme S1.  $[\text{B}_9\text{O}_{19}(\text{OH})]^{12-}$  cluster unit constructed from  $\text{BO}_3$  and  $\text{BO}_4$  units.

Figure S1. Photograph of  $\text{LiBa}_3(\text{OH})(\text{B}_9\text{O}_{16})[\text{B}(\text{OH})_4]$ .

Figure S2. Arrangement of the  $[\text{BO}_3]^{3-}$  groups of  $\text{LiBa}_3(\text{OH})(\text{B}_9\text{O}_{16})[\text{B}(\text{OH})_4]$  along the *c*-axis.

Figure S3. Structure view of  $\text{LiBa}_3(\text{OH})(\text{B}_9\text{O}_{16})[\text{B}(\text{OH})_4]$  down the *a*-axis.

Figure S4. Coordination environments of the Ba and Li atoms in  $\text{LiBa}_3(\text{OH})(\text{B}_9\text{O}_{16})[\text{B}(\text{OH})_4]$  (a), and the 3D framework formed by the Li-O and Ba-O groups (b).

Figure S5. Experimental and simulated powder X-ray diffraction patterns of  $\text{LiBa}_3(\text{OH})(\text{B}_9\text{O}_{16})[\text{B}(\text{OH})_4]$ .

Figure S6. IR spectrum of  $\text{LiBa}_3(\text{OH})(\text{B}_9\text{O}_{16})[\text{B}(\text{OH})_4]$ .

Figure S7. UV-Vis-NIR diffuse reflectance absorption spectra of  $\text{LiBa}_3(\text{OH})(\text{B}_9\text{O}_{16})[\text{B}(\text{OH})_4]$ .

Figure S8. Band structure of  $\text{LiBa}_3(\text{OH})(\text{B}_9\text{O}_{16})[\text{B}(\text{OH})_4]$ .

Figure S9. Calculated refractive indexes of  $\text{LiBa}_3(\text{OH})(\text{B}_9\text{O}_{16})[\text{B}(\text{OH})_4]$ .

**Table S1.** Selected bond distances (Å) and angles (deg) for LiBa<sub>3</sub>(OH)(B<sub>9</sub>O<sub>16</sub>)[B(OH)<sub>4</sub>]<sup>a</sup>.

|                      |            |                      |            |
|----------------------|------------|----------------------|------------|
| B(1)-O(4)            | 1.432(7)   | B(1)-O(2)            | 1.434(7)   |
| B(1)-O(3)            | 1.511(7)   | B(1)-O(1)            | 1.519(6)   |
| B(2)-O(4)#1          | 1.448(7)   | B(2)-O(2)            | 1.466(7)   |
| B(2)-O(7)            | 1.474(7)   | B(2)-O(6)            | 1.506(7)   |
| B(3)-O(8)#2          | 1.377(8)   | B(3)-O(8)            | 1.377(8)   |
| B(3)-O(8)#3          | 1.377(8)   | B(3)-O(9)            | 1.528(15)  |
| B(4)-O(7)#4          | 1.367(7)   | B(4)-O(3)            | 1.376(7)   |
| B(4)-O(6)#5          | 1.389(7)   |                      |            |
| Ba(1)-O(2)           | 2.747(4)   | Ba(1)-O(2) #7        | 2.871(3)   |
| Ba(1)-O(3)           | 2.925(4)   | Ba(1)-O(4) #7        | 2.677(4)   |
| Ba(1)-O(5)           | 2.7097(11) | Ba(1)-O(6)           | 3.065(4)   |
| Ba(1)-O(6) #8        | 2.780(4)   | Ba(1)-O(7) #8        | 3.032(4)   |
| Ba(1)-O(8)           | 3.103(11)  | Ba(1)-O(8) #7        | 2.993(10)  |
| Ba(1)-O(9)#7         | 2.852(14)  |                      |            |
| Li(1)-O(3) #9        | 2.595(18)  | Li(1)-O(3) #6        | 2.595(18)  |
| Li(1)-O(3) #10       | 2.595(18)  | Li(1)-O(5)           | 1.81(2)    |
| Li(1)-O(7)           | 2.239(4)   | Li(1)-O(7) #8        | 2.239(4)   |
| Li(1)-O(7) #11       | 2.239(4)   |                      |            |
| O(4)-B(1)-O(2)       | 109.9(4)   | O(4)-B(1)-O(3)       | 109.8(4)   |
| O(2)-B(1)-O(3)       | 112.0(4)   | O(4)-B(1)-O(1)       | 108.1(4)   |
| O(2)-B(1)-O(1)       | 110.0(4)   | O(3)-B(1)-O(1)       | 106.9(4)   |
| O(4) #1-B(2)-O(2)    | 111.7(4)   | O(4) #1-B(2)-O(7)    | 111.4(4)   |
| O(2)-B(2)-O(7)       | 111.2(4)   | O(4) #1-B(2)-O(6)    | 107.9(4)   |
| O(2)-B(2)-O(6)       | 107.8(4)   | O(7)-B(2)-O(6)       | 106.5(4)   |
| O(8)-B(3)-O(8) #2    | 119.57(15) | O(8)-B(3)-O(8) #3    | 119.57(15) |
| O(8) #2-B(3)-O(8) #3 | 119.57(15) | O(8) #2-B(3)-O(9)    | 118.5(9)   |
| O(8) #3-B(3)-O(9)    | 98.7(9)    | O(9)-B(3)-O(8)       | 98.7(9)    |
| O(7) #4-B(4)-O(3)    | 116.9(5)   | O(7) #4-B(4)-O(6) #5 | 122.0(5)   |
| O(3)-B(4)-O(6) #5    | 121.1(5)   |                      |            |

<sup>a</sup> Symmetry codes: #1 - y+1, x-y+1, z; #2 -y, x-y, z; #3 -x+y, -x, z;  
 #4 x-y, -y+1, z-1/2; #5 -x+y, -x+1, z; #6 -x+1, -x+y, z+1/2;  
 #7 x, y, z-1/2; #8 -y+1, x-y, z; #9 x, y, z+1/2;  
 #10 x-y+1, -y+1, z+1/2; #11 -x+y+1, -x+1, z.

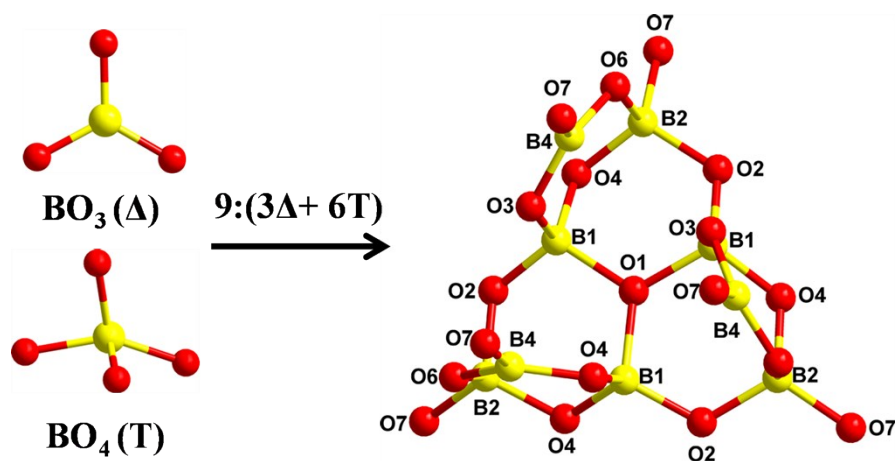

**Scheme S1.**  $[\text{B}_9\text{O}_{19}(\text{OH})]^{12-}$  cluster unit constructed from  $\text{BO}_3$  and  $\text{BO}_4$  units.

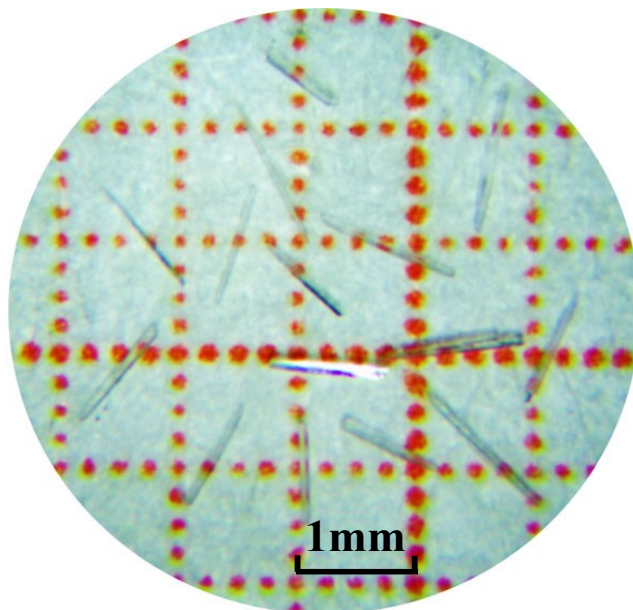

(a)

**Figure S1.** Photograph of  $\text{LiBa}_3(\text{OH})(\text{B}_9\text{O}_{16})[\text{B}(\text{OH})_4]$ .

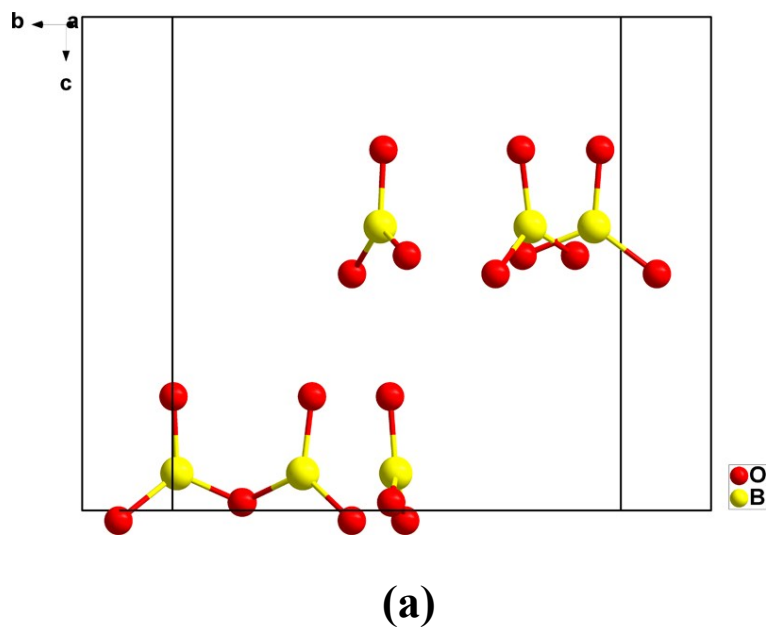

**Figure S2.** Arrangement of  $[\text{BO}_3]^{3-}$  groups of  $\text{LiBa}_3(\text{OH})(\text{B}_9\text{O}_{16})[\text{B}(\text{OH})_4]$  along the  $c$ -axis.

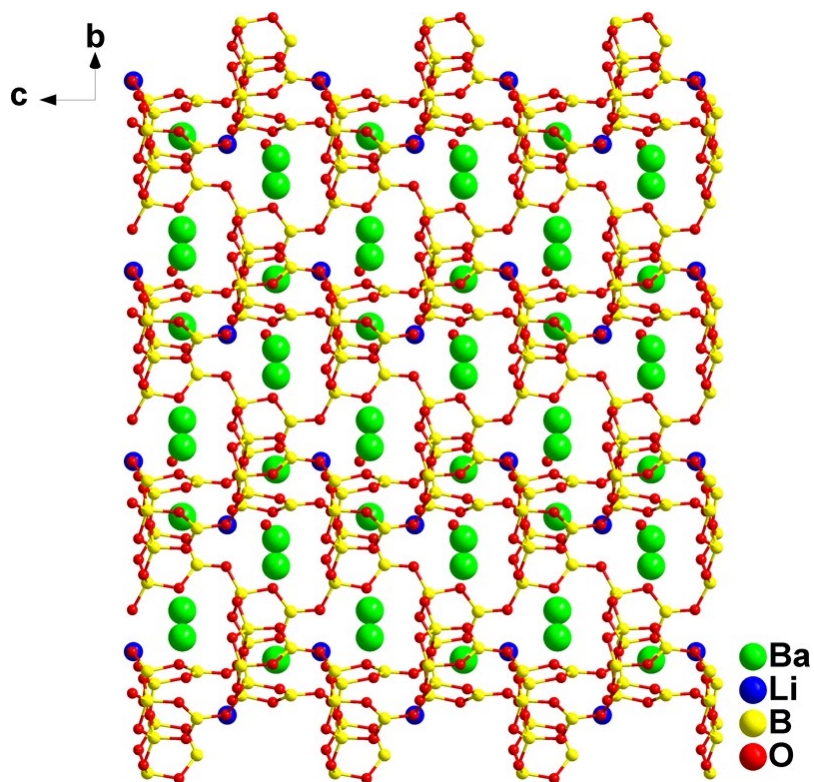

**Figure S3.** Structure view of  $\text{LiBa}_3(\text{OH})(\text{B}_9\text{O}_{16})[\text{B}(\text{OH})_4]$  down the  $a$ -axis.

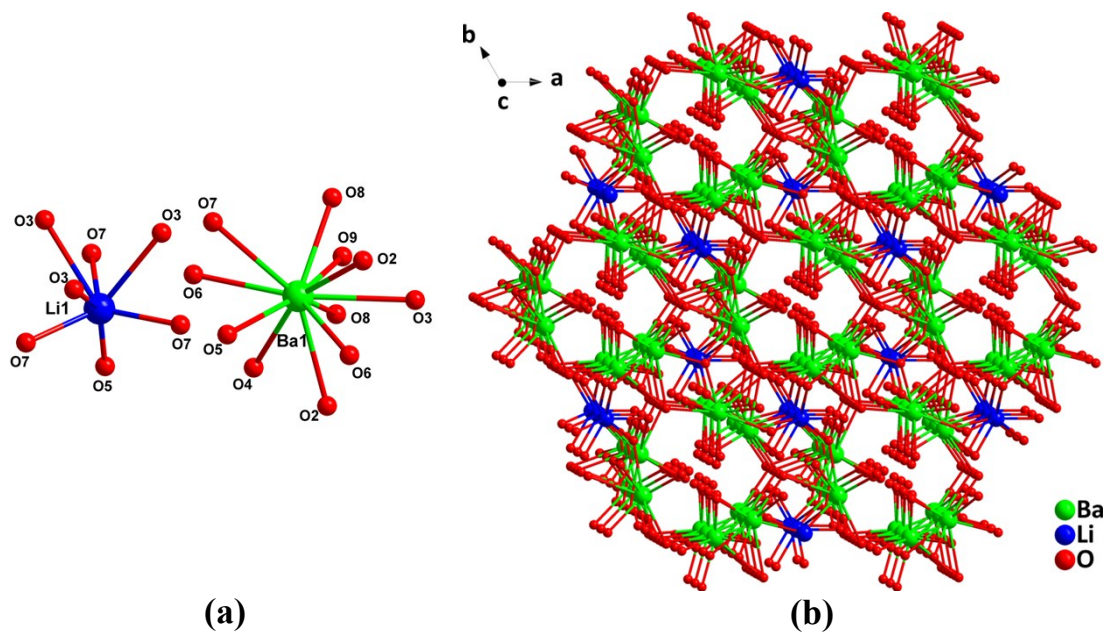

**Figure S4.** Coordination environments of the Ba and Li atoms in  $\text{LiBa}_3(\text{OH})(\text{B}_9\text{O}_{16})[\text{B}(\text{OH})_4]$  (a), and the 3D framework formed by the Li-O and Ba-O groups (b). Hydrogen atoms have been omitted for clarity.



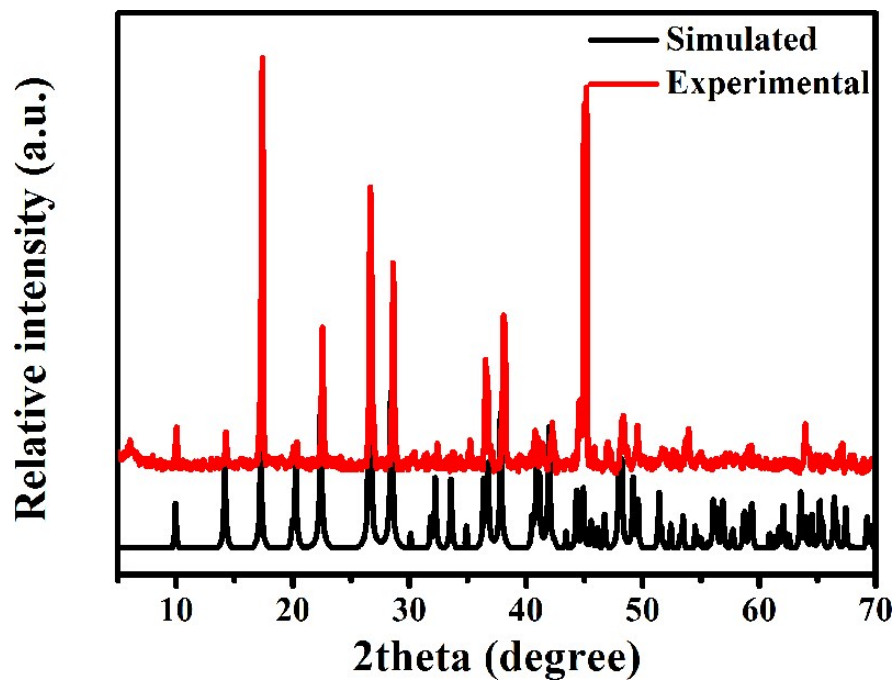

**Figure S5.** Experimental and simulated powder X-ray diffraction patterns of  $\text{LiBa}_3(\text{OH})(\text{B}_9\text{O}_{16})[\text{B}(\text{OH})_4]$ .

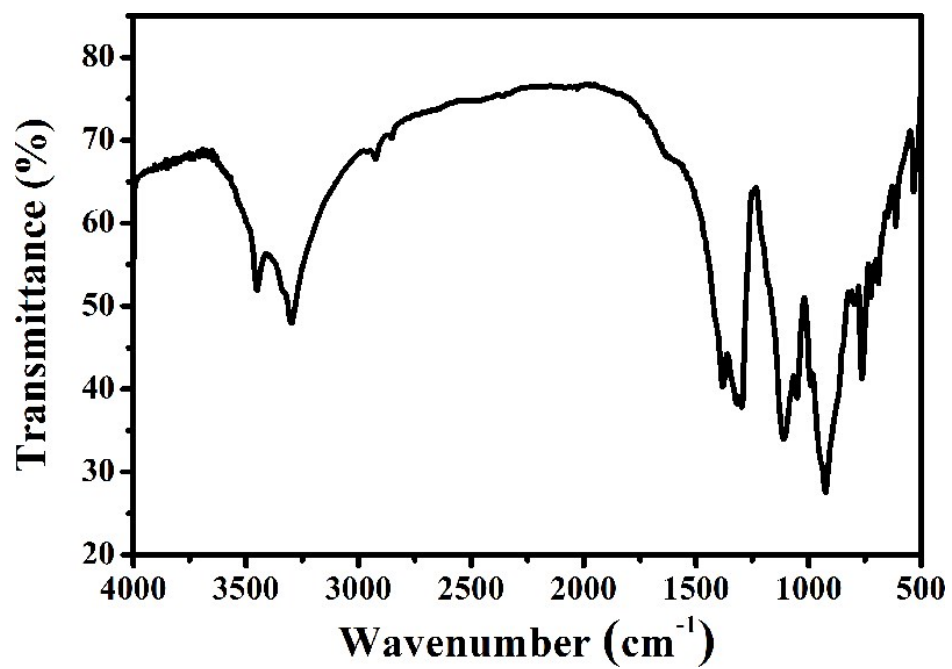

Figure S6. IR spectrum of  $\text{LiBa}_3(\text{OH})(\text{B}_9\text{O}_{16})[\text{B}(\text{OH})_4]$ .

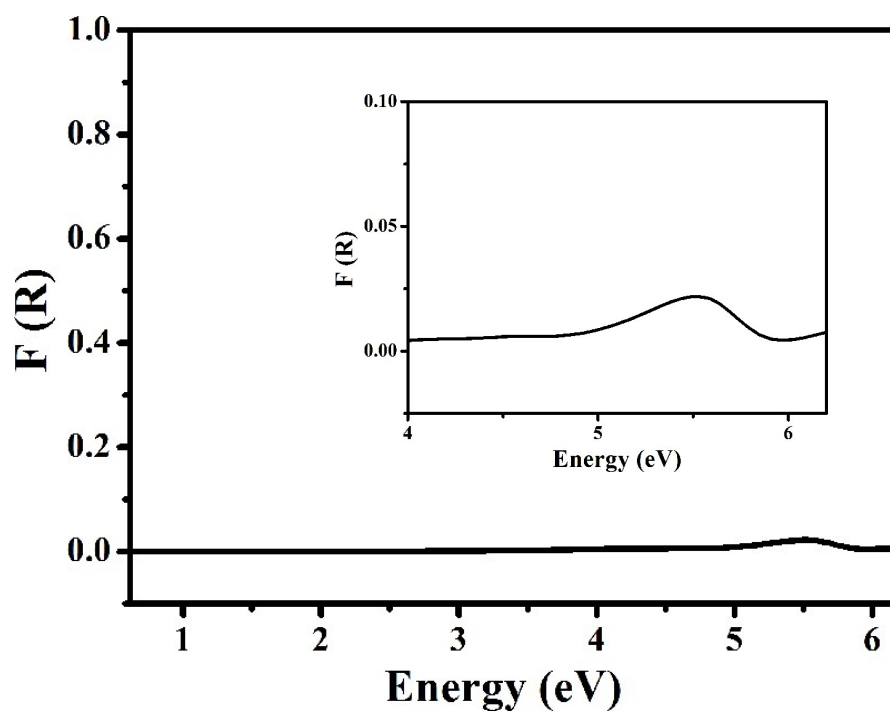

**Figure S7.** UV-Vis-NIR diffuse reflectance absorption spectra of  $\text{LiBa}_3(\text{OH})(\text{B}_9\text{O}_{16})[\text{B}(\text{OH})_4]$ .

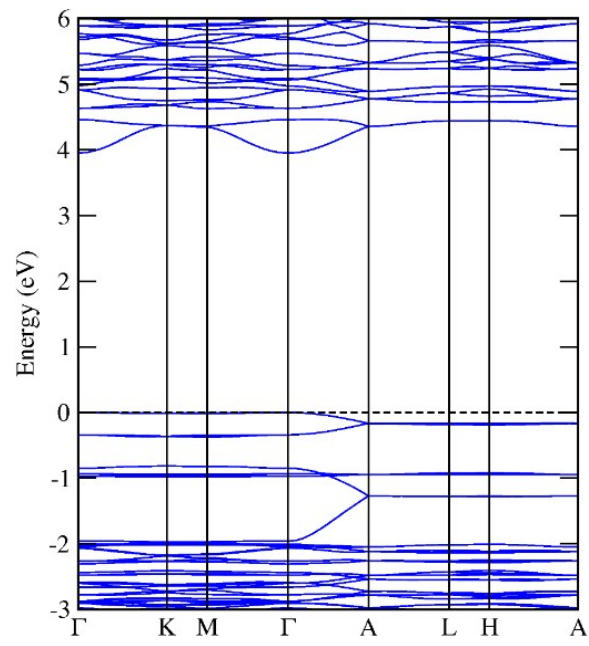

**Figure S8.** Band structure of  $\text{LiBa}_3(\text{OH})(\text{B}_9\text{O}_{16})[\text{B}(\text{OH})_4]$ .

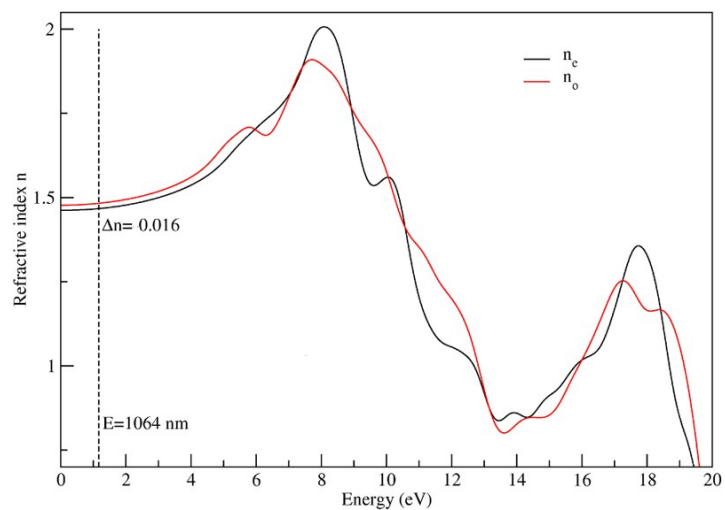

**Figure S9.** Calculated refractive indexes of  $\text{LiBa}_3(\text{OH})(\text{B}_9\text{O}_{16})[\text{B}(\text{OH})_4]$ .
